# Supplementary material for: Factors affecting pedestrian safety among the old people according to the PRECEDE model
Source: Research Square preprint supplement (doi:10.21203/rs.3.rs-7680309/v1), 2025-12-02
Supplement: Supplementary file 1 [file 24275697415c1d33cd3c58d9.pdf]

## **Questionnaire: Prevention of Traffic injuries(RTI) among Elderly Pedestrians**

Greetings

Dear respected elderly,

I, ....., a Ph.D. student in Health Education and Health Promotion at Hamadan University of Medical Sciences, am conducting the present study.

This questionnaire has been designed for a study aimed at identifying the factors and behaviors influencing the prevention of traffic-related injuries among elderly pedestrians in Hamadan city.

In this questionnaire, “preventive behaviors against traffic injuries” refer to actions that help protect you from the risks of vehicle accidents by practicing self-care.

The results of this study can be very useful in developing programs to improve the safety and health of elderly pedestrians. Therefore, we kindly ask for your participation in collecting the necessary information to help the researchers achieve their goals.

Your participation in this research is completely voluntary, confidential, and anonymous. The results will be reported in aggregate form. If you do not wish, you may refrain from participating or answering the questions at any time. Completing the questionnaire will take approximately 20 minutes.

We sincerely appreciate your cooperation in helping us carry out this research project. Please answer the questions if you are willing to participate.

.....,

Ph.D. Student of Health Education and Health Promotion,  
Hamadan University of Medical Sciences

Researcher's Address: Hamadan – Shahid Fahmideh Square – Hamadan University of Medical Sciences – School of Public Health

Researcher's Phone Number: .....

Elderly Participant's Phone Number (optional): .....

### **Part I – Demographic Characteristics of the Elderly**

1. Year of birth: .....

2. Gender: ☐ Male ☐ Female

3. Education: ☐ Literate only ☐ Primary ☐ Secondary ☐ High school ☐ Diploma ☐ Associate ☐ Bachelor's or higher

4. Marital status: ☐ Married (with spouse) ☐ Divorced ☐ Widowed ☐ Single

5. Number of children: .....

6. Health insurance coverage: ☐ Social Security ☐ Medical Services ☐ Armed Forces ☐ Other  
☐ None

7. Do you use a hearing aid? ☐ Yes ☐ No

8. Do you use glasses? ☐ Yes ☐ No

9. Do you use assistive devices while walking? ☐ Yes ☐ No  
If yes: ☐ Cane ☐ Walker ☐ Wheelchair ☐ other (specify)

## Part II – Behaviors Related to the Prevention of Traffic Injuries

| No. | Behavior                                                                 | Always                   | Someti<br>mes            | Never                    |
|-----|--------------------------------------------------------------------------|--------------------------|--------------------------|--------------------------|
| 1   | I stop at the red light before crossing.                                 | <input type="checkbox"/> | <input type="checkbox"/> | <input type="checkbox"/> |
| 2   | I use pedestrian crosswalks.                                             | <input type="checkbox"/> | <input type="checkbox"/> | <input type="checkbox"/> |
| 3   | I use pedestrian bridges.                                                | <input type="checkbox"/> | <input type="checkbox"/> | <input type="checkbox"/> |
| 4   | I walk on the sidewalk.                                                  | <input type="checkbox"/> | <input type="checkbox"/> | <input type="checkbox"/> |
| 5   | I choose the safest route to cross the street.                           | <input type="checkbox"/> | <input type="checkbox"/> | <input type="checkbox"/> |
| 6   | I avoid crossing from hidden places (between parked cars, bushes, etc.). | <input type="checkbox"/> | <input type="checkbox"/> | <input type="checkbox"/> |
| 7   | On steep slopes, I cross with extra caution.                             | <input type="checkbox"/> | <input type="checkbox"/> | <input type="checkbox"/> |
| 8   | I cross only when I have enough time.                                    | <input type="checkbox"/> | <input type="checkbox"/> | <input type="checkbox"/> |
| 9   | In snowy/icy weather, I cross with caution.                              | <input type="checkbox"/> | <input type="checkbox"/> | <input type="checkbox"/> |
| 10  | In rainy/foggy weather, I cross with caution.                            | <input type="checkbox"/> | <input type="checkbox"/> | <input type="checkbox"/> |
| 11  | At dusk or dawn, I cross with caution.                                   | <input type="checkbox"/> | <input type="checkbox"/> | <input type="checkbox"/> |
| 12  | I avoid rushing when crossing.                                           | <input type="checkbox"/> | <input type="checkbox"/> | <input type="checkbox"/> |
| 13  | I pay attention to vehicle distance and speed.                           | <input type="checkbox"/> | <input type="checkbox"/> | <input type="checkbox"/> |
| 14  | I look around and listen carefully.                                      | <input type="checkbox"/> | <input type="checkbox"/> | <input type="checkbox"/> |
| 15  | I wear bright clothes, especially at night.                              | <input type="checkbox"/> | <input type="checkbox"/> | <input type="checkbox"/> |

### Part III – Environmental Factors

| No. | Statement                                                                | Yes                      | No                       | I don't know             |
|-----|--------------------------------------------------------------------------|--------------------------|--------------------------|--------------------------|
| 1   | Safe places for crossing (bridges, underpasses, etc.) exist on my route. | <input type="checkbox"/> | <input type="checkbox"/> | <input type="checkbox"/> |
| 2   | A pedestrian overpass exists along my route.                             | <input type="checkbox"/> | <input type="checkbox"/> | <input type="checkbox"/> |
| 3   | The overpass has escalators.                                             | <input type="checkbox"/> | <input type="checkbox"/> | <input type="checkbox"/> |
| 4   | There is sufficient street lighting for safe crossing.                   | <input type="checkbox"/> | <input type="checkbox"/> | <input type="checkbox"/> |
| 5   | The green light time is adequate for elderly pedestrians.                | <input type="checkbox"/> | <input type="checkbox"/> | <input type="checkbox"/> |
| 6   | The red light waiting time is sufficient for elderly crossing.           | <input type="checkbox"/> | <input type="checkbox"/> | <input type="checkbox"/> |
| 7   | Hazardous areas are fenced off.                                          | <input type="checkbox"/> | <input type="checkbox"/> | <input type="checkbox"/> |
| 8   | There are narrowed street sections to reduce vehicle speed.              | <input type="checkbox"/> | <input type="checkbox"/> | <input type="checkbox"/> |
| 9   | There are enough speed bumps on my route.                                | <input type="checkbox"/> | <input type="checkbox"/> | <input type="checkbox"/> |
| 10  | Speed limit signs exist in my neighborhood.                              | <input type="checkbox"/> | <input type="checkbox"/> | <input type="checkbox"/> |
| 11  | There are suitable pedestrian walkways along my route.                   | <input type="checkbox"/> | <input type="checkbox"/> | <input type="checkbox"/> |
| 12  | There are enough pedestrian crosswalks along my route.                   | <input type="checkbox"/> | <input type="checkbox"/> | <input type="checkbox"/> |

#### Part IV – Predisposing Factors (Knowledge, Attitudes and Self-Efficacy)

##### \*\*Knowledge, Attitudes, and Beliefs Related to Accident Prevention\*\*

| No. | Statement                                                                       | Agree                    | Somewhat                 | Disagree                 |
|-----|---------------------------------------------------------------------------------|--------------------------|--------------------------|--------------------------|
| 1   | Not following traffic rules may cause accidents and injuries.                   | <input type="checkbox"/> | <input type="checkbox"/> | <input type="checkbox"/> |
| 2   | Traffic accidents happen by chance and cannot be prevented.                     | <input type="checkbox"/> | <input type="checkbox"/> | <input type="checkbox"/> |
| 3   | It is better to use a safe way (underpass/overpass) to cross.                   | <input type="checkbox"/> | <input type="checkbox"/> | <input type="checkbox"/> |
| 4   | Elderly people should cross at pedestrian crosswalks.                           | <input type="checkbox"/> | <input type="checkbox"/> | <input type="checkbox"/> |
| 5   | Elderly should choose crossing places with clear visibility.                    | <input type="checkbox"/> | <input type="checkbox"/> | <input type="checkbox"/> |
| 6   | Elderly should cross where drivers can easily see them.                         | <input type="checkbox"/> | <input type="checkbox"/> | <input type="checkbox"/> |
| 7   | Elderly should pay attention to traffic lights when crossing.                   | <input type="checkbox"/> | <input type="checkbox"/> | <input type="checkbox"/> |
| 8   | Ignoring traffic rules may cause accidents and injuries to elderly pedestrians. | <input type="checkbox"/> | <input type="checkbox"/> | <input type="checkbox"/> |
| 9   | Elderly should look both ways before crossing.                                  | <input type="checkbox"/> | <input type="checkbox"/> | <input type="checkbox"/> |
| 10  | Elderly should avoid unmarked crossing areas.                                   | <input type="checkbox"/> | <input type="checkbox"/> | <input type="checkbox"/> |
| 11  | Elderly should cross only when they have enough time.                           | <input type="checkbox"/> | <input type="checkbox"/> | <input type="checkbox"/> |
| 12  | Taking antidepressants may distract elderly when crossing.                      | <input type="checkbox"/> | <input type="checkbox"/> | <input type="checkbox"/> |
| 13  | Wearing bright clothes reduces accident risk, especially at night.              | <input type="checkbox"/> | <input type="checkbox"/> | <input type="checkbox"/> |

##### \*\*Self-Efficacy in Accident Prevention\*\*

| No. | Statement                                                             | Agree                    | Somewhat                 | Disagree                 |
|-----|-----------------------------------------------------------------------|--------------------------|--------------------------|--------------------------|
| 1   | I am confident that by following traffic rules, I can avoid injuries. | <input type="checkbox"/> | <input type="checkbox"/> | <input type="checkbox"/> |
| 2   | I am confident I can use safe behaviors when crossing.                | <input type="checkbox"/> | <input type="checkbox"/> | <input type="checkbox"/> |
| 3   | When I decide to cross, I can focus carefully.                        | <input type="checkbox"/> | <input type="checkbox"/> | <input type="checkbox"/> |
| 4   | If an unexpected problem occurs while crossing, I can handle it.      | <input type="checkbox"/> | <input type="checkbox"/> | <input type="checkbox"/> |
| 5   | I trust my ability to cross during peak traffic hours.                | <input type="checkbox"/> | <input type="checkbox"/> | <input type="checkbox"/> |

### Part V- Reinforcing Factors

| No. | Statement                                                      | Agree                    | Somewhat                 | Disagree                 |
|-----|----------------------------------------------------------------|--------------------------|--------------------------|--------------------------|
| 1   | When my friends practice safe crossing, I want to do the same. | <input type="checkbox"/> | <input type="checkbox"/> | <input type="checkbox"/> |
| 2   | My family encourages me to follow safe crossing behaviors.     | <input type="checkbox"/> | <input type="checkbox"/> | <input type="checkbox"/> |
| 3   | Health staff encourage me to follow safe crossing behaviors.   | <input type="checkbox"/> | <input type="checkbox"/> | <input type="checkbox"/> |
| 4   | My friends encourage me to attend safety training classes.     | <input type="checkbox"/> | <input type="checkbox"/> | <input type="checkbox"/> |
| 5   | My family encourages me to attend safety training classes.     | <input type="checkbox"/> | <input type="checkbox"/> | <input type="checkbox"/> |
| 6   | Health staff encourage me to attend safety training classes.   | <input type="checkbox"/> | <input type="checkbox"/> | <input type="checkbox"/> |
| 7   | Seeing others obey red lights encourages me to do the same.    | <input type="checkbox"/> | <input type="checkbox"/> | <input type="checkbox"/> |
| 8   | Media (radio/TV) encourage me to follow safe behaviors.        | <input type="checkbox"/> | <input type="checkbox"/> | <input type="checkbox"/> |

### Part VI- Enabling Factors

| No. | Statement                                                                            | Agree                    | Somewhat                 | Disagree                 |
|-----|--------------------------------------------------------------------------------------|--------------------------|--------------------------|--------------------------|
| 1   | Pedestrian bridges along my route do not have escalators.                            | <input type="checkbox"/> | <input type="checkbox"/> | <input type="checkbox"/> |
| 2   | Bridges with elevators are suitable for elderly people.                              | <input type="checkbox"/> | <input type="checkbox"/> | <input type="checkbox"/> |
| 3   | Infrastructures (underpasses/overpasses) are not designed considering elderly needs. | <input type="checkbox"/> | <input type="checkbox"/> | <input type="checkbox"/> |
| 4   | Public transport drivers do not consider elderly physical conditions when boarding.  | <input type="checkbox"/> | <input type="checkbox"/> | <input type="checkbox"/> |
| 5   | Some streets lack designated pedestrian paths.                                       | <input type="checkbox"/> | <input type="checkbox"/> | <input type="checkbox"/> |
| 6   | There are no speed bumps at crossings for elderly safety.                            | <input type="checkbox"/> | <input type="checkbox"/> | <input type="checkbox"/> |
| 7   | The green light timing does not match elderly walking speed.                         | <input type="checkbox"/> | <input type="checkbox"/> | <input type="checkbox"/> |
| 8   | Traffic projects are constructed too slowly.                                         | <input type="checkbox"/> | <input type="checkbox"/> | <input type="checkbox"/> |
| 9   | I have received training on preventive behaviors.                                    | <input type="checkbox"/> | <input type="checkbox"/> | <input type="checkbox"/> |

|    |                                                                       |                          |                          |                          |
|----|-----------------------------------------------------------------------|--------------------------|--------------------------|--------------------------|
| 10 | I have access to educational materials (books, brochures, videos).    | <input type="checkbox"/> | <input type="checkbox"/> | <input type="checkbox"/> |
| 11 | I have the skills to safely cross streets.                            | <input type="checkbox"/> | <input type="checkbox"/> | <input type="checkbox"/> |
| 12 | I have the skills to use escalators safely and maintain balance.      | <input type="checkbox"/> | <input type="checkbox"/> | <input type="checkbox"/> |
| 13 | Assistive devices (cane, glasses, hearing aids) help me cross safely. | <input type="checkbox"/> | <input type="checkbox"/> | <input type="checkbox"/> |

Thank you for your cooperation, dear elder.
